# Supplementary material for: Genome-Wide Investigation and Expression Profiling of HD-Zip Transcription Factors in Foxtail Millet (Setaria italicaL.)
Source: Hindawi journal article supplement (doi:10.1155/2018/8457614), 2018-01-01
Supplement: f1 [file 8457614.f1.zip]

## Supplementary Material

**Table S1. Functions of HD-Zip proteins searched by Blast2GO.**

[illegible]

|         |                                            |                                                              |  |    |
|---------|--------------------------------------------|--------------------------------------------------------------|--|----|
| Sihdz20 | regulation of transcription, DNA-dependent | transcription factor activity; sequence-specific DNA binding |  | IV |
| Sihdz23 | regulation of transcription, DNA-dependent | transcription factor activity; sequence-specific DNA binding |  | IV |
| Sihdz24 | regulation of transcription, DNA-dependent | transcription factor activity; sequence-specific DNA binding |  | IV |
| Sihdz25 |                                            |                                                              |  | IV |
| Sihdz26 | regulation of transcription, DNA-dependent | transcription factor activity; sequence-specific DNA binding |  | IV |
| Sihdz30 | regulation of transcription, DNA-dependent | transcription factor activity; sequence-specific DNA binding |  | IV |
| Sihdz31 | regulation of transcription, DNA-dependent | transcription factor activity; sequence-specific DNA binding |  | IV |
| Sihdz32 | regulation of transcription, DNA-dependent | transcription factor activity; sequence-specific DNA binding |  | IV |
| Sihdz35 | regulation of transcription, DNA-dependent | transcription factor activity; sequence-specific DNA binding |  | IV |
| Sihdz36 | regulation of transcription, DNA-dependent | transcription factor activity; sequence-specific DNA binding |  | IV |
| Sihdz42 | regulation of transcription, DNA-dependent | transcription factor activity; sequence-specific DNA binding |  | IV |

**Table S2. Cis-acting element of promoter.**

| Site Name       | Number of genes | Function of the cis-elements                                        | Cis-elements types  |
|-----------------|-----------------|---------------------------------------------------------------------|---------------------|
| CGTCA-motif     | 42              | cis-acting regulatory element involved in the MeJA-responsiveness   | Hormone responsive  |
| TGACG-motif     | 42              | cis-acting regulatory element involved in the MeJA-responsiveness   | Hormone responsive  |
| MBS             | 40              | MYB binding site involved in drought-inducibility                   | Stress responsive   |
| ARE             | 33              | cis-acting regulatory element essential for the anaerobic induction | Stress responsive   |
| ABRE            | 30              | cis-acting element involved in the abscisic acid responsiveness     | Hormone responsive  |
| GC-motif        | 29              | enhancer-like element involved in anoxic specific inducibility      | Stress responsive   |
| motif IIb       | 25              | abscisic acid responsive element                                    | Hormone responsive  |
| CAT-box         | 20              | cis-acting regulatory element related to meristem expression        | Meristem expression |
| TC-rich repeats | 19              | cis-acting element involved in defense and stress responsiveness    | Stress responsive   |
| TCA-element     | 18              | cis-acting element involved in salicylic acid responsiveness        | Hormone responsive  |
| TCA-element     | 18              | cis-acting element involved in salicylic acid responsiveness        | Hormone responsive  |
| TGA-element     | 18              | auxin-responsive element                                            | Hormone responsive  |
| GARE-motif      | 17              | gibberellin-responsive element                                      | Hormone responsive  |
| HSE             | 9               | cis-acting element involved in heat stress responsiveness           | Stress responsive   |

**Figure S1. Chromosomal distribution and segmental duplication events of 25 sihdz genes in green foxtail.**

**Figure S2. Expression profiles of sihdz genes in different tissues.** The RNA-Seq data were analyzed and a heat map was generated. Values from 0 to 7 represent low to high expression.
